# Supplementary material
Source: Springer Nature journal article supplement (https://www.springermedizin.de/resource/supplementary/12891_2012_1637_MOESM4_ESM.pdf/9508144)

CA1-Tg mice with  
injection of collagen

wide-type mice with  
injection of collagen

PADI4-Tg mice with  
injection of collagen

CA1-Tg mice with  
injection of BSA

ankle  
joints

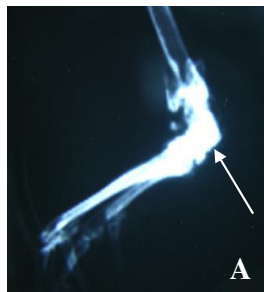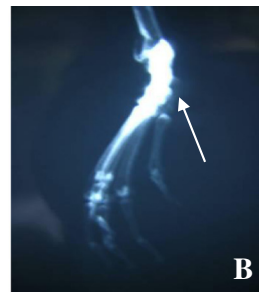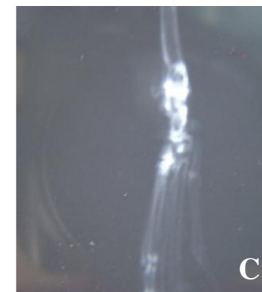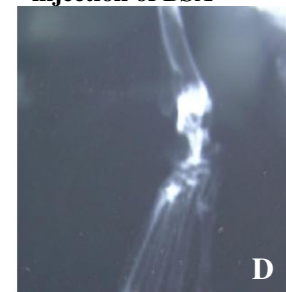

sacrum  
joints

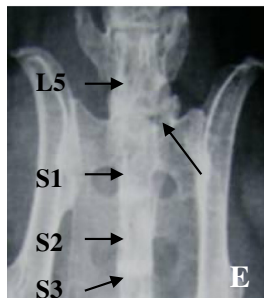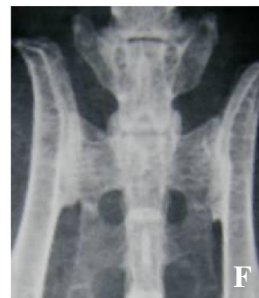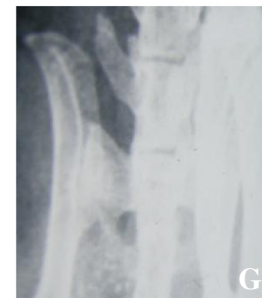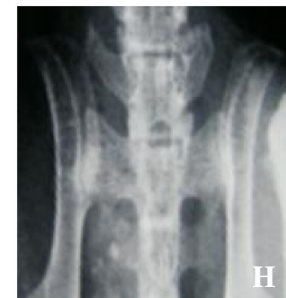

sacrum  
joints

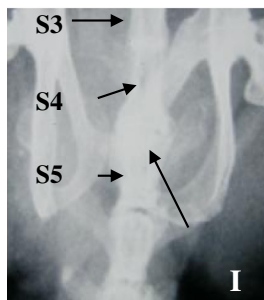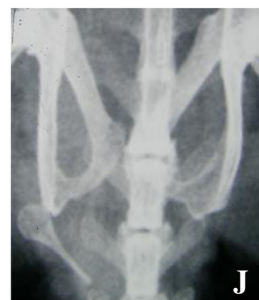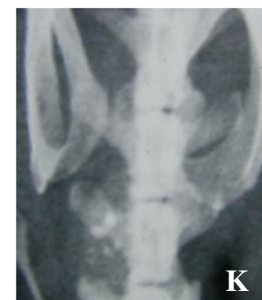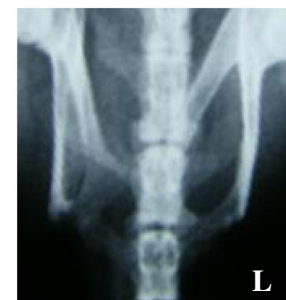

Supplement: MOESM4 [file 9508144]
